# Supplementary material for: Mycobacteriophages as Incubators for Intein Dissemination and Evolution
Source: PubMed Central journal article supplement (PMC5050341; doi:10.1128/mbio.01537-16), 2016-10-04
Supplement: mbo005163016st3.pdf [file mbo005163016st3.pdf]

**Table S3.** Percent identity between the splicing domains of mycobacteriophage TerL1-**c** and -**e** and mycobacterial DnaB-**b** inteins

|                |                        | TerL1- <b>c</b> |           |          |        | TerL1- <b>e</b> |
|----------------|------------------------|-----------------|-----------|----------|--------|-----------------|
|                |                        | Anglerfish      | Bethlehem | Petp2012 | Violet | Gaia            |
| DnaB- <b>b</b> | <i>M. asiaticum</i>    | 41.1%           | 45.3%     | 45.3%    | 44.2%  | 54.7%           |
|                | <i>M. chubuense</i>    | 44.2%           | 46.3%     | 46.3%    | 46.3%  | 54.7%           |
|                | <i>M. fortitutum</i>   | 42.1%           | 47.4%     | 47.4%    | 46.3%  | 54.7%           |
|                | <i>M. leprae</i>       | 41.1%           | 46.3%     | 46.3%    | 45.3%  | 52.6%           |
|                | <i>M. lepromatosis</i> | 41.1%           | 46.3%     | 46.3%    | 45.3%  | 52.6%           |
|                | <i>M. rhodesiae</i>    | 46.3%           | 51.6%     | 51.6%    | 50.5%  | 52.6%           |
|                | <i>M. septicum</i>     | 44.2%           | 47.4%     | 47.4%    | 46.3%  | 54.7%           |
|                | <i>M. smegmatis</i>    | 42.1%           | 47.4%     | 47.4%    | 46.3%  | 54.7%           |
